# Supplementary material for: Global gene expression during stringent response in Corynebacterium glutamicum in presence and absence of the rel gene encoding (p)ppGpp synthase
Source: Springer Nature journal article supplement (doi:10.1186/1471-2164-7-230), 2006-09-08
Supplement: Additional file 1 [file 1471-2164-7-230-s1.pdf]

| Locus tag <sup>a</sup> | ratio (Drel/RES) | ratio (RES <sub>t10</sub> /RES <sub>t0</sub> ) | ratio (Drel <sub>t10</sub> /Drel <sub>t0</sub> ) | gene name    | annotation                                                                              | COG class <sup>b</sup> |
|------------------------|------------------|------------------------------------------------|--------------------------------------------------|--------------|-----------------------------------------------------------------------------------------|------------------------|
| cg0007                 | 2,02             |                                                |                                                  | <i>gyrB</i>  | DNA gyrase subunit B                                                                    | L                      |
| cg0047                 | 0,12             |                                                |                                                  |              | Conserved hypothetical protein                                                          | M                      |
| cg0049                 | 0,50             |                                                |                                                  |              | Putative membrane protein, Rhomboid-family                                              | R                      |
| cg0057                 |                  | 1,54                                           |                                                  | <i>pknB</i>  | Serine/threonine protein kinase                                                         | RTKL                   |
| cg0064                 |                  |                                                | 0,44                                             |              | Conserved hypothetical protein                                                          | T                      |
| cg0065                 |                  |                                                | 0,56                                             |              | Hypothetical protein                                                                    |                        |
| cg0077                 | 3,93             |                                                |                                                  |              | Conserved hypothetical protein                                                          |                        |
| cg0078                 | 5,31             |                                                |                                                  |              | Putative membrane protein                                                               |                        |
| cg0079                 | 3,24             |                                                |                                                  |              | Putative secreted protein                                                               | M                      |
| cg0081                 | 1,97             |                                                |                                                  |              | Putative tautomerase                                                                    | R                      |
| cg0082                 | 1,64             |                                                |                                                  |              | Chloride ion channel, CIC-family                                                        | P                      |
| cg0088                 | 0,57             |                                                |                                                  | <i>citP</i>  | Putative secondary Mg <sup>2+</sup> /H <sup>+</sup> :citrate transporter, CitMHS-family | C                      |
| cg0107                 | 2,23             |                                                |                                                  |              | Putative secreted protein                                                               | NU                     |
| cg0113                 |                  | 0,63                                           |                                                  | <i>ureA</i>  | Urease gamma subunit                                                                    | E                      |
| cg0129                 | 1,68             |                                                |                                                  | <i>putA</i>  | Proline dehydrogenase/delta-1-pyrroline-5-carboxylate dehydrogenase                     | C                      |
| cg0138                 |                  |                                                | 1,73                                             |              | ATP/GTP-binding protein                                                                 |                        |
| cg0154                 | 1,54             |                                                |                                                  |              | Putative hydrolase                                                                      | R                      |
| cg0161                 |                  |                                                | 1,70                                             |              | Putative membrane protein                                                               |                        |
| cg0175                 | 1,89             |                                                |                                                  |              | Putative secreted protein                                                               |                        |
| cg0177                 | 1,54             |                                                |                                                  |              | Hypothetical protein                                                                    |                        |
| cg0194                 |                  |                                                | 1,54                                             |              | Putative secreted protein                                                               |                        |
| cg0215                 | 0,59             | 0,64                                           | 0,63                                             | <i>cspA</i>  | Cold-shock protein A                                                                    | K                      |
| cg0216                 | 0,63             |                                                |                                                  |              | Putative membrane protein                                                               |                        |
| cg0221                 | 0,58             |                                                |                                                  |              | Putative transcriptional regulator, LacI-family                                         | K                      |
| cg0229                 |                  | 0,37                                           |                                                  | <i>gltB</i>  | Glutamate synthase (NADPH), large chain                                                 | E                      |
| cg0238                 | 1,68             |                                                | 1,72                                             |              | FAD/FMN-containing dehydrogenase                                                        | C                      |
| cg0242                 |                  |                                                | 3,21                                             |              | Hypothetical protein                                                                    |                        |
| cg0249                 |                  | 0,61                                           |                                                  |              | ABC-type putative polysaccharide transporter, permease subunit                          | GM                     |
| cg0281                 |                  |                                                | 0,64                                             |              | tRNA-specific adenosine deaminase                                                       | FJ                     |
| cg0291                 | 2,50             | 0,62                                           |                                                  |              | Putative dioxygenase                                                                    | Q                      |
| cg0297                 |                  | 1,70                                           |                                                  |              | Conserved hypothetical protein, DUF149-family                                           | S                      |
| cg0306                 | 1,72             |                                                |                                                  | <i>lysC</i>  | Aspartate kinase                                                                        | E                      |
| cg0307                 | 1,87             |                                                |                                                  | <i>asd</i>   | Aspartate-semialdehyde dehydrogenase                                                    | E                      |
| cg0310                 | 0,46             | 3,39                                           | 4,90                                             | <i>katA</i>  | Catalase                                                                                | P                      |
| cg0337                 |                  |                                                | 0,59                                             | <i>whiB4</i> | Putative transcriptional regulator, WhiB-family                                         |                        |
| cg0352                 | 1,61             |                                                |                                                  |              | Putative secreted protein                                                               |                        |
| cg0359                 | 2,00             |                                                |                                                  |              | Putative membrane protein                                                               |                        |
| cg0378                 | 1,54             |                                                |                                                  |              | Putative phage-associated protein                                                       | S                      |
| cg0387                 |                  |                                                | 1,83                                             |              | Putative NAD/mycothiol-dependent formaldehyde dehydrogenase                             | C                      |
| cg0394                 |                  |                                                | 0,59                                             |              | Putative glycosyl transferase                                                           | M                      |
| cg0400                 |                  |                                                | 1,63                                             | <i>adhC</i>  | Putative alcohol dehydrogenase (NADP(+))                                                | R                      |
| cg0414                 |                  | 1,68                                           |                                                  | <i>wzz</i>   | Cell surface polysaccharide biosynthesis/chain length determinant                       | D                      |
| cg0416                 |                  |                                                | 1,67                                             |              | Putative secreted protein, carrying a eukaryotic domain                                 |                        |
| cg0419                 | 0,59             | 0,63                                           |                                                  |              | Putative glycosyltransferase                                                            | M                      |
| cg0431                 | 0,56             |                                                |                                                  |              | Putative membrane protein, involved in polysaccharide                                   | I                      |

|        |      |      |      |              |                                                                    |   |
|--------|------|------|------|--------------|--------------------------------------------------------------------|---|
|        |      |      |      |              | acetylation                                                        |   |
| cg0435 | 0,48 |      | 0,47 | <i>udgA1</i> | UDP-glucose 6-dehydrogenase                                        | M |
| cg0438 |      |      | 0,66 |              | Putative glycosyltransferase                                       | M |
| cg0441 |      | 0,63 |      | <i>lpd</i>   | Dihydrolipoamide dehydrogenase                                     | C |
| cg0442 | 0,58 |      | 0,66 | <i>galU2</i> | Putative UTP--glucose-1-phosphate uridylyltransferase              | M |
| cg0448 |      |      | 0,56 |              | Conserved putative membrane protein                                |   |
| cg0450 |      |      | 1,74 |              | Conserved hypothetical protein                                     |   |
| cg0453 | 1,53 |      |      |              | Putative membrane protein                                          |   |
| cg0464 | 0,63 | 0,62 | 0,40 | <i>ctpA</i>  | Putative Cu <sup>2+</sup> transporting P-type ATPase               | P |
| cg0467 | 2,12 |      |      |              | ABC-type putative hemin transporter, substrate-binding lipoprotein | P |
| cg0475 | 1,91 |      |      |              | Conserved hypothetical protein                                     |   |
| cg0489 | 1,61 |      |      |              | Putative membrane protein                                          |   |
| cg0490 |      |      | 1,62 | <i>proC</i>  | Pyrraline-5-carboxylate reductase                                  | E |
| cg0513 | 1,98 |      |      |              | Putative membrane protein                                          |   |
| cg0527 | 1,75 |      |      |              | Putative transcriptional regulator, ArsR-family                    | K |
| cg0528 | 2,42 |      |      |              | Putative secreted protein                                          |   |
| cg0538 | 2,63 |      |      |              | Conserved hypothetical protein                                     |   |
| cg0552 |      | 1,78 |      | <i>menD</i>  | 2-Oxoglutarate decarboxylase                                       | H |
| cg0563 |      |      | 0,31 | <i>rplK</i>  | 50S ribosomal protein L11                                          | J |
| cg0564 | 1,76 |      | 0,43 | <i>rplA</i>  | 50S ribosomal protein L1                                           | J |
| cg0569 | 1,93 |      |      |              | Putative Cd <sup>2+</sup> transporting P-type ATPase               | P |
| cg0576 | 1,57 |      | 0,65 | <i>rpoB</i>  | DNA-directed RNA polymerase, beta chain                            | K |
| cg0581 |      | 0,56 | 0,45 | <i>rpsL</i>  | 30S ribosomal protein S12                                          | J |
| cg0582 |      | 0,31 | 0,43 | <i>rpsG</i>  | 30S ribosomal protein S7                                           | J |
| cg0587 |      |      | 2,07 | <i>tuf</i>   | Elongation factor Tu                                               | J |
| cg0593 |      | 0,40 | 0,31 | <i>rpsJ</i>  | 30S ribosomal protein S10                                          | J |
| cg0594 |      | 0,38 | 0,44 | <i>rplC</i>  | 50S ribosomal protein L3                                           | J |
| cg0597 | 2,41 | 0,35 | 0,29 | <i>rplW</i>  | 50S ribosomal protein L23                                          | J |
| cg0597 | 1,61 | 0,36 | 0,26 | <i>rplW</i>  | 50S ribosomal protein L23                                          | J |
| cg0599 | 1,76 | 0,54 |      | <i>rpsS</i>  | 30S ribosomal protein S19                                          | J |
| cg0600 |      | 0,46 | 0,31 | <i>rplV</i>  | 50S ribosomal protein L22                                          | J |
| cg0601 | 2,95 |      | 0,30 | <i>rpsC</i>  | 30S ribosomal protein S3                                           | J |
| cg0602 | 1,86 | 0,49 | 0,28 | <i>rplP</i>  | 50S ribosomal protein L16                                          | J |
| cg0603 | 1,65 | 0,56 | 0,26 | <i>rpmC</i>  | 50S ribosomal protein L29                                          | J |
| cg0604 | 2,11 | 0,43 | 0,47 | <i>rpsQ</i>  | 30S ribosomal protein S17                                          | J |
| cg0608 |      | 0,41 | 0,26 | <i>rplN</i>  | 50S ribosomal protein L14                                          | J |
| cg0609 |      | 0,48 | 0,45 | <i>rplX</i>  | 50S ribosomal protein L24                                          | J |
| cg0610 |      | 0,43 | 0,34 | <i>rplE</i>  | 50S ribosomal protein L5                                           | J |
| cg0620 |      |      | 0,57 |              | Putative secreted protein                                          |   |
| cg0628 |      | 0,46 | 0,34 | <i>rpsH</i>  | 30S ribosomal protein S8                                           | J |
| cg0629 |      | 0,42 | 0,48 | <i>rplF</i>  | 50S ribosomal protein L6                                           | J |
| cg0630 |      | 0,61 | 0,29 | <i>rplR</i>  | 50S ribosomal protein L18                                          | J |
| cg0631 |      | 0,62 | 0,18 | <i>rpsE</i>  | 30S ribosomal protein S5                                           | J |
| cg0632 |      | 0,51 | 0,19 | <i>rpmD</i>  | 50S ribosomal protein L30                                          | J |
| cg0634 |      | 0,43 | 0,19 | <i>rplO</i>  | 50S ribosomal protein L15                                          | J |
| cg0637 |      | 0,60 |      | <i>betB</i>  | Putative betaine aldehyde dehydrogenase (BADH)                     | C |
| cg0648 |      |      | 1,53 | <i>adk</i>   | Adenylate kinase                                                   | F |
| cg0650 |      |      | 1,67 |              | Putative secreted protein                                          | S |
| cg0651 |      | 0,46 | 0,31 | <i>infA</i>  | Translation initiation factor IF-1                                 | J |
| cg0652 |      | 0,52 | 0,40 | <i>rpsM</i>  | 30S ribosomal protein S13                                          | J |
| cg0653 | 1,65 | 0,60 | 0,51 | <i>rpsK</i>  | 30S ribosomal protein S11                                          | J |
| cg0654 |      | 0,56 | 0,33 | <i>rpsD</i>  | 30S ribosomal protein S4                                           | J |
| cg0655 | 1,65 | 0,57 | 0,38 | <i>rpoA</i>  | DNA-directed RNA polymerase, alpha subunit                         | K |

|        |      |      |      |               |                                                                                               |    |
|--------|------|------|------|---------------|-----------------------------------------------------------------------------------------------|----|
| cg0656 | 1,65 | 0,54 | 0,43 | <i>rplQ</i>   | 50S ribosomal protein L17                                                                     | J  |
| cg0673 | 1,55 | 0,51 | 0,43 | <i>rplM</i>   | 50S ribosomal protein L13                                                                     | J  |
| cg0674 | 2,12 |      | 0,65 | <i>rpsI</i>   | 30S ribosomal protein S9                                                                      | J  |
| cg0675 |      |      | 0,58 | <i>mrsA</i>   | Putative phosphoglucosamine mutase/phosphomannomutase                                         | G  |
| cg0690 | 1,85 |      |      | <i>groES</i>  | 10kDa chaperonin                                                                              | O  |
| cg0691 | 2,16 |      |      | <i>groEL'</i> | 60kDa chaperonin, putative pseudogene (N-terminal fragment)                                   | O  |
| cg0693 | 1,58 |      |      | <i>'groEL</i> | 60kDa chaperonin, putative pseudogene (C-terminal fragment)                                   | O  |
| cg0696 | 0,27 |      |      | <i>sigD</i>   | RNA polymerase sigma factor, ECF-family                                                       | K  |
| cg0699 | 1,64 |      |      | <i>guaB2</i>  | IMP dehydrogenase                                                                             | F  |
| cg0700 |      |      | 0,64 | <i>guaB3</i>  | IMP dehydrogenase/GMP reductase                                                               | F  |
| cg0701 |      |      | 0,62 |               | Putative secondary drug/metabolite transporter, drug/metabolite transporter (DMT) superfamily | R  |
| cg0703 | 1,76 |      |      | <i>guaA</i>   | Putative GMP synthase                                                                         | F  |
| cg0706 | 3,95 |      |      |               | Conserved putative membrane protein                                                           | KT |
| cg0712 | 1,66 |      |      |               | Putative secreted protein                                                                     |    |
| cg0717 |      |      | 1,77 | <i>crtEb</i>  | Lycopene elongase                                                                             | H  |
| cg0720 |      |      | 1,64 | <i>crtI2</i>  | Phytoene dehydrogenase (desaturase)                                                           | Q  |
| cg0725 | 0,64 |      | 0,64 |               | Putative transcriptional regulator, MarR-family                                               | K  |
| cg0752 | 1,93 |      |      |               | Putative secreted or membrane protein                                                         | S  |
| cg0753 | 1,99 |      |      |               | Putative secreted protein                                                                     |    |
| cg0754 | 1,84 | 0,59 |      | <i>metX</i>   | Homoserine O-acetyltransferase                                                                | E  |
| cg0755 | 1,62 |      |      | <i>metY</i>   | O-Acetylhomoserine sulfhydrylase                                                              | E  |
| cg0756 | 0,60 | 0,47 | 0,48 | <i>cstA</i>   | Putative carbon starvation protein A                                                          | T  |
| cg0766 | 1,64 |      | 1,71 | <i>icd</i>    | Isocitrate dehydrogenase                                                                      | C  |
| cg0773 |      |      | 1,55 |               | Putative exodeoxyribonuclease                                                                 | L  |
| cg0774 | 0,64 |      |      |               | Putative membrane protein                                                                     | S  |
| cg0775 | 0,56 |      |      |               | Hypothetical protein                                                                          |    |
| cg0778 | 0,55 |      |      |               | ABC-type putative iron-siderophore transporter, permease subunit                              | P  |
| cg0781 | 3,71 |      |      |               | Putative membrane protein                                                                     |    |
| cg0791 | 0,50 |      |      | <i>pyc</i>    | Pyruvate carboxylase                                                                          | C  |
| cg0793 | 0,59 |      |      |               | Putative secreted protein                                                                     | S  |
| cg0811 | 0,50 |      |      | <i>dtsR2</i>  | Acetyl/propionyl-CoA carboxylase, beta chain                                                  | I  |
| cg0812 | 0,28 | 1,52 | 2,13 | <i>dtsR1</i>  | Acetyl/propionyl-CoA carboxylase, beta chain                                                  | I  |
| cg0834 |      | 1,66 |      |               | ABC-type putative sugar transporter, substrate-binding lipoprotein                            | G  |
| cg0841 |      | 0,64 |      |               | Conserved hypothetical protein                                                                | S  |
| cg0842 | 0,58 |      |      |               | Putative DNA helicase                                                                         | L  |
| cg0849 |      |      | 0,61 | <i>rmlA2</i>  | Mannose-1-phosphate guanylyltransferase (GDP)                                                 | MJ |
| cg0850 |      |      | 0,61 | <i>whiB2</i>  | Putative transcriptional regulator, WhiB-family                                               |    |
| cg0853 |      |      | 0,63 |               | Conserved hypothetical protein                                                                |    |
| cg0858 |      |      | 1,58 |               | Putative secreted protein                                                                     | S  |
| cg0865 |      | 0,61 |      |               | Putative secreted lipoprotein                                                                 |    |
| cg0866 | 0,57 |      |      |               | Conserved hypothetical protein                                                                | R  |
| cg0867 | 2,38 |      | 2,16 |               | Putative ribosome-associated protein Y (PSrp-1)                                               | J  |
| cg0878 | 0,31 |      |      | <i>whiB1</i>  | Putative transcriptional regulator, WhiB-family                                               |    |
| cg0882 | 0,57 | 0,64 |      |               | Conserved hypothetical protein                                                                |    |
| cg0883 |      |      | 1,57 |               | Conserved putative secreted                                                                   |    |

|        |      |      |      |               |                                                                                                             |   |
|--------|------|------|------|---------------|-------------------------------------------------------------------------------------------------------------|---|
|        |      |      |      |               | protein                                                                                                     |   |
| cg0885 |      | 0,62 |      |               | Putative helicase, UvrD/Rep-family                                                                          | L |
| cg0892 |      | 1,59 |      |               | Conserved hypothetical protein                                                                              | S |
| cg0893 |      |      | 0,63 |               | Putative secreted protein, containing a PDZ-domain                                                          | T |
| cg0898 | 0,35 | 3,33 | 2,75 |               | Pyridoxine biosynthesis enzyme                                                                              | H |
| cg0899 | 0,39 | 3,55 | 3,31 |               | Putative glutamine amidotransferase, involved in pyridoxine biosynthesis                                    | H |
| cg0904 |      |      | 1,80 |               | Hypothetical protein                                                                                        |   |
| cg0910 | 0,64 |      | 1,59 | <i>himP</i>   | Histidinol-phosphatase, ImpA-family                                                                         | G |
| cg0913 |      |      | 0,64 | <i>prfB</i>   | Peptide chain release factor 2 (RF-2)                                                                       | J |
| cg0922 | 0,65 |      |      |               | ABC-type putative iron-siderophore transporter, substrate-binding lipoprotein                               | P |
| cg0924 |      | 4,34 |      |               | ABC-type putative iron-siderophore transporter, substrate-binding lipoprotein                               | P |
| cg0926 |      | 1,84 |      |               | ABC-type putative iron-siderophore transporter, permease subunit                                            | P |
| cg0928 |      | 1,85 |      |               | ABC-type putative iron-siderophore transporter, ATPase subunit                                              | P |
| cg0936 | 0,15 |      |      | <i>rpf1</i>   | RPF-protein precursor                                                                                       |   |
| cg0938 |      |      | 0,64 |               | Cold shock protein                                                                                          | K |
| cg0939 |      |      | 0,65 |               | Putative secreted protein                                                                                   |   |
| cg0952 | 1,83 | 2,29 |      |               | Putative integral membrane protein                                                                          | S |
| cg0953 | 1,99 | 2,66 |      |               | Putative Na <sup>+</sup> /solute symporter, solute:sodium symporter (SSS) family                            | R |
| cg0957 | 0,57 |      |      | <i>fas-IB</i> | Fatty acid synthase                                                                                         | I |
| cg0980 | 0,29 |      |      |               | Putative secreted protein, related to metalloendopeptidases                                                 | M |
| cg0984 | 1,59 |      |      | <i>purH</i>   | Phosphoribosylaminoimidazolecarboxamide formyltransferase                                                   | F |
| cg0988 |      | 0,60 | 0,34 | <i>rpsR</i>   | 30S ribosomal protein S18                                                                                   | J |
| cg0989 |      | 0,60 | 0,39 | <i>rpsN</i>   | 30S ribosomal protein S14                                                                                   | J |
| cg0990 |      |      | 0,41 | <i>rpmG</i>   | 50S ribosomal protein L33                                                                                   | J |
| cg0991 |      |      | 0,42 | <i>rpmB</i>   | 50S ribosomal protein L28                                                                                   | J |
| cg0994 |      | 0,59 | 0,41 | <i>rpmE</i>   | Putative 50S ribosomal protein L31                                                                          | J |
| cg0998 | 6,22 |      |      |               | Trypsin-like serine protease                                                                                | O |
| cg0999 | 2,20 |      |      |               | Putative molybdopterin biosynthesis protein                                                                 | H |
| cg1010 |      |      | 0,60 |               | Putative membrane protein                                                                                   | S |
| cg1013 |      | 1,55 |      |               | Hypothetical protein                                                                                        |   |
| cg1016 |      |      | 0,60 | <i>betP</i>   | Putative secondary glycine betaine/choline transporter, betaine/carnitine/choline transporter (BCCT) family | M |
| cg1037 | 0,40 |      |      | <i>rpf2</i>   | RPF2 precursor, secreted protein                                                                            | S |
| cg1038 | 0,65 |      | 0,64 | <i>ksgA</i>   | Putative dimethyladenosine transferase                                                                      | J |
| cg1039 | 0,61 |      | 0,62 |               | Putative isopentenyl monophosphate kinase                                                                   | I |
| cg1049 |      | 0,65 |      |               | Putative enoyl-CoA hydratase/isomerase                                                                      | I |
| cg1055 | 1,78 |      |      | <i>menG</i>   | S-Adenosylmethionine:2-demethylmenaquinone methyltransferase                                                | H |
| cg1057 | 0,66 |      |      |               | Hypothetical protein                                                                                        | S |
| cg1061 | 0,65 |      |      | <i>urtA</i>   | ABC-type putative branched-chain amino acid transporter, substrate-binding lipoprotein                      | E |
| cg1062 |      | 0,46 |      | <i>urtB</i>   | ABC-type putative branched-chain amino acid transporter, permease subunit                                   | E |

|        |      |      |      |              |                                                                                                      |    |
|--------|------|------|------|--------------|------------------------------------------------------------------------------------------------------|----|
| cg1068 | 1,92 |      |      |              | Putative oxidoreductase                                                                              | R  |
| cg1071 | 1,79 |      |      | <i>pth1</i>  | Putative peptidyl-tRNA hydrolase                                                                     | J  |
| cg1072 |      |      | 0,56 | <i>rplY</i>  | Ribosomal protein L25 (general stress protein Ctc)                                                   | J  |
| cg1075 | 2,37 |      |      | <i>prsA</i>  | Ribose-phosphate diphosphokinase                                                                     | FE |
| cg1080 | 1,69 |      |      |              | Putative multicopper oxidase                                                                         | Q  |
| cg1091 | 0,41 |      |      |              | Hypothetical protein                                                                                 |    |
| cg1095 | 0,48 |      | 0,56 |              | Hypothetical protein                                                                                 |    |
| cg1097 | 0,58 |      | 0,65 |              | Hypothetical protein                                                                                 |    |
| cg1099 |      | 0,65 |      | <i>mfd</i>   | Transcription-repair coupling factor (TRCF)                                                          | LK |
| cg1104 | 1,83 |      |      |              | Putative membrane protein, predicted esterase                                                        | R  |
| cg1109 |      |      | 0,53 |              | Hypothetical protein                                                                                 |    |
| cg1110 | 2,10 |      | 1,56 |              | Conserved hypothetical protein                                                                       | M  |
| cg1113 |      |      | 1,57 |              | Conserved hypothetical protein                                                                       | S  |
| cg1115 |      |      | 0,61 | <i>ppx2</i>  | Putative exopolyphosphatase                                                                          | FP |
| cg1121 | 1,62 |      |      |              | Permease, MFS-type                                                                                   | S  |
| cg1122 | 1,55 |      |      |              | Putative secreted protein                                                                            |    |
| cg1125 | 1,69 |      |      |              | Conserved hypothetical protein                                                                       |    |
| cg1125 | 1,68 |      |      |              | Conserved hypothetical protein                                                                       |    |
| cg1129 | 0,55 |      |      | <i>aroF</i>  | Putative phospho-2-dehydro-3-deoxyheptonate aldolase                                                 | E  |
| cg1130 | 1,76 |      |      | <i>uppS1</i> | Putative undecaprenyl pyrophosphate synthetase                                                       | I  |
| cg1131 | 1,69 |      |      |              | Conserved hypothetical protein                                                                       |    |
| cg1136 |      |      | 1,67 |              | Conserved hypothetical protein                                                                       |    |
| cg1138 | 0,49 |      |      |              | Putative acetyltransferase, GNAT-family                                                              | M  |
| cg1139 | 0,60 |      | 0,41 |              | Allophanate hydrolase subunit 2                                                                      | E  |
| cg1140 |      |      | 0,50 |              | Allophanate hydrolase subunit 1                                                                      | E  |
| cg1141 |      |      | 0,46 |              | Conserved hypothetical protein, UPF0271-family                                                       | R  |
| cg1142 | 0,37 |      | 0,49 |              | Putative Mn <sup>2+</sup> transporter, metal ion (Mn <sup>2+</sup> -iron) transporter (Nramp) family | P  |
| cg1147 | 1,62 |      |      | <i>ssul</i>  | NAD(P)H-dependent FMN reductase                                                                      | R  |
| cg1150 | 0,40 |      |      |              | Putative NADPH-dependent FMN reductase                                                               | R  |
| cg1157 |      |      | 1,89 | <i>glpX</i>  | Fructose-1,6-bisphosphatase II                                                                       | G  |
| cg1158 | 0,55 |      | 0,54 |              | Putative secreted protein                                                                            |    |
| cg1171 | 1,78 |      |      |              | Putative GTPase                                                                                      | J  |
| cg1181 |      |      | 1,89 |              | Glycosyltransferase, probably involved in cell wall biogenesis                                       | M  |
| cg1201 | 0,65 |      |      |              | Hypothetical protein                                                                                 |    |
| cg1203 |      |      | 1,94 |              | Putative magnesium chelatase, ChlI subunit                                                           | H  |
| cg1228 | 1,53 |      |      |              | ABC-type putative cobalt transporter, ATPase subunit                                                 | P  |
| cg1236 |      |      | 2,27 | <i>tpx</i>   | Thiol peroxidase                                                                                     | O  |
| cg1245 | 0,59 |      |      |              | Putative membrane protein                                                                            | S  |
| cg1246 | 0,64 |      |      |              | Conserved hypothetical protein                                                                       | S  |
| cg1247 | 0,55 |      |      |              | Putative secreted protein                                                                            |    |
| cg1255 |      |      | 1,64 |              | Conserved hypothetical protein, putative HNH endonuclease                                            |    |
| cg1263 | 0,65 |      |      |              | Glycosyltransferase, involved in cell wall biogenesis                                                | M  |
| cg1265 |      |      | 0,60 |              | Conserved hypothetical protein                                                                       |    |
| cg1271 | 4,32 |      |      | <i>sigE</i>  | RNA polymerase sigma factor, ECF-family                                                              | K  |
| cg1277 | 2,68 |      |      |              | Conserved putative membrane protein                                                                  |    |
| cg1278 | 2,15 |      |      |              | Conserved putative secreted protein                                                                  |    |
| cg1279 | 2,69 |      |      |              | Putative secreted protein                                                                            |    |

|        |      |      |      |              |                                                                                                            |     |
|--------|------|------|------|--------------|------------------------------------------------------------------------------------------------------------|-----|
| cg1280 | 1,54 |      | 1,74 | <i>odhA</i>  | 2-Oxoglutarate dehydrogenase, E1 component                                                                 | C   |
| cg1283 |      |      | 1,68 | <i>aroE2</i> | Putative shikimate/quininate 5-dehydrogenase                                                               | E   |
| cg1284 |      |      | 1,54 | <i>lipT</i>  | Putative carboxylesterase, type B                                                                          | I   |
| cg1290 |      | 1,56 |      | <i>metE</i>  | 5-Methyltetrahydropteroyltriglutamate--homocysteine methyltransferase                                      | E   |
| cg1291 |      | 1,88 | 1,86 |              | Putative membrane protein                                                                                  |     |
| cg1293 |      | 1,56 |      |              | Putative secreted protein                                                                                  |     |
| cg1300 |      |      | 1,98 | <i>cydB</i>  | Cytochrome d ubiquinol oxidase subunit II                                                                  | C   |
| cg1301 |      |      | 1,70 | <i>cydA</i>  | Cytochrome d ubiquinol oxidase subunit I                                                                   | C   |
| cg1304 | 0,53 |      |      |              | Putative secreted protein                                                                                  |     |
| cg1307 | 0,43 |      | 1,97 |              | DNA/RNA helicase, superfamily II                                                                           | LKJ |
| cg1307 | 0,32 |      |      |              | DNA/RNA helicase, superfamily II                                                                           | LKJ |
| cg1314 | 2,21 |      |      | <i>putP</i>  | Putative Na <sup>+</sup> /proline symporter, solute:sodium symporter (SSS) family                          | ER  |
| cg1324 | 2,08 |      |      |              | Putative transcriptional regulator, MarR-family                                                            | K   |
| cg1325 | 2,52 |      |      |              | Conserved hypothetical protein                                                                             | KT  |
| cg1327 | 2,08 |      |      |              | Putative transcriptional regulator, Crp-family                                                             | T   |
| cg1330 | 0,66 |      |      |              | Conserved hypothetical protein                                                                             | S   |
| cg1337 | 1,65 |      |      | <i>hom</i>   | Homoserine dehydrogenase                                                                                   | E   |
| cg1338 | 1,53 |      |      | <i>thrB</i>  | Homoserine kinase                                                                                          | E   |
| cg1341 |      | 0,56 |      | <i>narI</i>  | Respiratory nitrate reductase 2, gamma chain                                                               | C   |
| cg1342 |      | 0,59 |      | <i>narJ</i>  | Respiratory nitrate reductase 2, delta chain                                                               | C   |
| cg1343 |      | 0,65 | 0,47 | <i>narH</i>  | Respiratory nitrate reductase 2, beta chain                                                                | C   |
| cg1344 | 0,58 | 0,54 | 0,41 | <i>narG</i>  | Respiratory nitrate reductase 2, alpha chain                                                               | C   |
| cg1345 |      | 0,57 | 0,37 | <i>narK</i>  | Putative nitrate/nitrite permease, MFS-type                                                                | P   |
| cg1346 |      |      | 0,58 | <i>mog</i>   | Putative molybdopterin biosynthesis protein Mog                                                            | H   |
| cg1364 |      |      | 1,57 | <i>atpF</i>  | ATP synthase F0, B chain                                                                                   | C   |
| cg1365 |      |      | 1,55 | <i>atpH</i>  | ATP synthase F1, delta subunit                                                                             | C   |
| cg1366 |      |      | 2,29 | <i>atpA</i>  | ATP synthase F1, alpha chain                                                                               | C   |
| cg1367 | 1,53 |      | 0,65 | <i>atpG</i>  | ATP synthase F1, gamma chain                                                                               | C   |
| cg1368 | 2,13 |      |      | <i>atpD</i>  | ATP synthase F1, beta chain                                                                                | C   |
| cg1370 | 0,62 |      |      |              | Conserved hypothetical protein                                                                             |     |
| cg1373 | 2,36 |      |      |              | Putative glyoxalase                                                                                        | E   |
| cg1387 |      |      | 1,99 | <i>fixB</i>  | Putative electron transfer flavoprotein, alpha subunit                                                     | C   |
| cg1391 | 1,67 |      |      |              | Conserved hypothetical protein, related to capsule biosynthesis enzymes                                    | R   |
| cg1397 |      |      | 0,53 | <i>trmU</i>  | tRNA (5-methylaminomethyl-2-thiouridylate)-methyltransferase                                               | J   |
| cg1409 |      |      | 1,52 | <i>pfkA</i>  | 6-Phosphofructokinase                                                                                      | G   |
| cg1417 | 1,62 |      |      |              | Putative acetyltransferase                                                                                 | J   |
| cg1419 |      | 0,66 |      |              | Putative secondary Na <sup>+</sup> /bile acid symporter, bile acid:Na <sup>+</sup> symporter (BASS) family | R   |
| cg1421 | 2,18 |      |      |              | Conserved hypothetical protein, putative dinucleotide-binding enzyme                                       | R   |
| cg1421 |      | 0,64 |      |              | Conserved hypothetical protein, putative dinucleotide-binding enzyme                                       | R   |
| cg1429 |      |      | 1,52 |              | Putative membrane protein                                                                                  | S   |
| cg1454 | 0,58 |      |      |              | ABC-type putative aliphatic sulfonates transporter, substrate-binding lipoprotein                          | P   |

|        |      |      |      |              |                                                                                                                    |    |
|--------|------|------|------|--------------|--------------------------------------------------------------------------------------------------------------------|----|
| cg1458 | 1,69 |      |      |              | Putative hydrolase, FAA-family                                                                                     | Q  |
| cg1459 | 1,55 |      |      |              | Putative SAM-dependent methyltransferase                                                                           | QR |
| cg1478 | 1,80 |      |      |              | Hypothetical protein                                                                                               |    |
| cg1479 | 0,61 |      |      | <i>glgP1</i> | Putative glycogen phosphorylase                                                                                    | G  |
| cg1483 | 1,53 |      |      |              | Putative membrane protein                                                                                          | R  |
| cg1484 |      |      | 1,59 |              | Putative secreted protein                                                                                          |    |
| cg1511 | 0,58 |      |      |              | Hypothetical protein                                                                                               |    |
| cg1514 | 1,77 |      | 1,73 |              | Putative secreted protein                                                                                          | M  |
| cg1516 |      |      | 0,65 |              | Hypothetical protein                                                                                               |    |
| cg1517 |      |      | 0,55 |              | Putative secreted protein                                                                                          |    |
| cg1537 |      |      | 0,46 | <i>ptsG</i>  | Phosphotransferase system (PTS), glucose-specific enzyme I/BCA component                                           | G  |
| cg1542 | 0,64 |      |      |              | Putative membrane protein                                                                                          |    |
| cg1547 | 2,27 |      |      | <i>ccpA1</i> | Putative transcriptional regulator, LacI-family                                                                    | K  |
| cg1564 | 0,65 |      |      | <i>rpl</i>   | 50S ribosomal protein L35                                                                                          | J  |
| cg1565 |      | 0,63 | 0,63 | <i>rplT</i>  | 50S ribosomal protein L20                                                                                          | J  |
| cg1567 |      |      | 0,62 |              | Hypothetical protein                                                                                               |    |
| cg1580 | 1,74 |      |      | <i>argC</i>  | N-acetyl-gamma-glutamyl-phosphate reductase                                                                        | E  |
| cg1586 | 1,57 |      |      | <i>argG</i>  | Argininosuccinate synthase                                                                                         | E  |
| cg1606 | 1,55 | 0,47 |      | <i>pyrG</i>  | CTP synthetase                                                                                                     | F  |
| cg1607 | 1,52 | 0,58 |      |              | Putative NTP pyrophosphohydrolase                                                                                  | LR |
| cg1613 | 1,85 |      |      | <i>sseA2</i> | Rhodanese-related sulfurtransferase                                                                                | P  |
| cg1615 | 0,63 |      |      |              | 16S rRNA uridine-516 pseudouridylate synthase or related pseudouridylate synthase                                  | J  |
| cg1616 | 0,66 |      | 0,53 | <i>cmk</i>   | Cytidylate kinase                                                                                                  | F  |
| cg1617 | 0,59 |      |      |              | GTPase of unknown function                                                                                         | R  |
| cg1623 |      |      | 0,50 |              | Putative divalent heavy-metal cation transporter                                                                   | P  |
| cg1624 | 1,75 | 1,56 |      |              | Putative secondary Na <sup>+</sup> /H <sup>+</sup> antiporter, monovalent cation:proton antiporter-1 (CPA1) family | P  |
| cg1626 |      | 1,69 | 2,39 |              | Conserved hypothetical protein                                                                                     | S  |
| cg1628 |      |      | 1,88 |              | Putative hydrolase, alpha/beta superfamily                                                                         | R  |
| cg1630 |      |      | 1,54 |              | Putative signal transduction protein, FHA -domain                                                                  | T  |
| cg1631 | 1,66 |      | 1,70 |              | Putative transcriptional regulator, MerR-family                                                                    | K  |
| cg1635 | 2,00 |      |      |              | Putative membrane protein                                                                                          |    |
| cg1643 | 0,50 |      | 6,10 | <i>gnd</i>   | Phosphogluconate dehydrogenase (decarboxylating)                                                                   | G  |
| cg1646 |      |      | 1,62 |              | ABC-type multidrug transport system, ATPase subunit                                                                | V  |
| cg1649 | 1,59 |      |      | <i>pctD</i>  | ABC-type phosphate/phosphonate transporter, permease subunit (TC 3.A.1.9.1)                                        | P  |
| cg1650 | 2,05 |      |      | <i>pctC</i>  | ABC-type phosphate/phosphonate transporter, permease subunit (TC 3.A.1.9.1)                                        | P  |
| cg1651 | 3,21 |      |      | <i>pctB</i>  | ABC-type phosphate/phosphonate transporter, ATPase subunit (TC 3.A.1.9.1)                                          | P  |
| cg1652 | 5,80 |      |      | <i>pctA</i>  | ABC-type alkylphosphonate transporter, substrate-binding lipoprotein (TC 3.A.1.9.1)                                | P  |
| cg1653 | 1,98 |      |      | <i>pgp1</i>  | Putative phosphoglycolate phosphatase                                                                              | R  |
| cg1662 | 2,20 |      |      |              | Putative secreted protein                                                                                          |    |
| cg1671 | 0,46 |      | 0,42 |              | Putative membrane-associated GTPase                                                                                |    |
| cg1672 |      |      | 0,61 | <i>ppmC</i>  | Polyprenol-phosphate-mannose synthase domain 1                                                                     | M  |

|        |      |      |      |              |                                                                                     |    |
|--------|------|------|------|--------------|-------------------------------------------------------------------------------------|----|
| cg1684 | 1,71 |      |      | <i>tatC</i>  | Putative twin arginine targeting (Tat) Preprotein translocase subunit               | U  |
| cg1685 | 1,76 |      |      | <i>tatX</i>  | Putative twin arginine targeting (Tat) Preprotein translocase subunit               | U  |
| cg1693 |      |      | 1,75 | <i>pepC</i>  | Aspartyl aminopeptidase                                                             | E  |
| cg1694 | 0,64 |      |      | <i>recB</i>  | Exonuclease, RecB-family                                                            | L  |
| cg1707 | 0,53 |      |      |              | Putative arsenate reductase (arsenical pump modifier)                               | T  |
| cg1709 |      | 0,66 |      | <i>mshC</i>  | Putative 1-D-myo-inositol-2-amino-2-deoxy-alpha-D-glucopyranoside-L-cysteine ligase | J  |
| cg1711 |      | 0,57 |      |              | Putative oxidoreductase                                                             | C  |
| cg1717 | 0,53 |      |      |              | Putative membrane protein                                                           |    |
| cg1718 |      |      | 2,27 |              | Phospholipid-binding protein                                                        | R  |
| cg1730 |      |      | 1,92 |              | Putative secreted protease subunit, stomatin/prohibitin-like                        | O  |
| cg1731 | 0,66 |      |      |              | Membrane protein, implicated in regulation of membrane protease activity            | OU |
| cg1737 |      |      | 2,03 | <i>acn</i>   | Aconitate hydratase                                                                 | C  |
| cg1739 | 1,82 |      |      |              | Conserved hypothetical protein, containing a glutamine amidotransferase domain      | F  |
| cg1743 | 0,63 |      |      |              | Conserved hypothetical protein                                                      | S  |
| cg1759 |      |      | 2,82 |              | Putative metal-sulfur cluster biosynthetic enzyme                                   | R  |
| cg1760 | 0,60 |      | 2,36 |              | Protein involved in Fe-S cluster formation, NifU-family                             | C  |
| cg1761 | 0,56 | 1,62 | 3,81 | <i>nifS2</i> | Cysteine desulfhydrase, AT class IV/selenocysteine lyase                            | E  |
| cg1762 | 0,61 |      | 3,70 | <i>sufC</i>  | FeS assembly ATPase, SufC-family                                                    | O  |
| cg1763 | 0,61 | 1,53 | 6,60 | <i>sufD</i>  | FeS assembly membrane protein, SufD-family                                          | O  |
| cg1764 | 0,64 | 1,76 | 2,43 | <i>sufB</i>  | FeS assembly membrane protein, SufB-family                                          | O  |
| cg1765 | 0,50 | 1,61 | 1,72 |              | Putative regulator protein                                                          | K  |
| cg1773 |      |      | 0,65 | <i>ctaB</i>  | Polyprenyltransferase, cytochrome oxidase assembly factor                           | H  |
| cg1776 | 1,56 |      |      | <i>tal</i>   | Transaldolase                                                                       | G  |
| cg1783 |      | 0,30 |      | <i>soxA'</i> | Putative oxidase, pseudogene (N-terminal fragment)                                  | E  |
| cg1784 |      | 0,51 |      | <i>ocd</i>   | Putative ornithine cyclodeaminase                                                   | E  |
| cg1785 | 1,85 | 0,28 |      | <i>amt</i>   | Putative secondary ammonium transporter, Amt-family                                 | P  |
| cg1790 | 0,61 |      |      | <i>pgk</i>   | Phosphoglycerate kinase                                                             | G  |
| cg1792 | 0,54 |      | 0,60 |              | Putative transcriptional regulator, WhiB-family                                     | S  |
| cg1801 | 1,88 |      | 0,59 | <i>rpe</i>   | Ribulose-5-phosphate-3-epimerase                                                    | G  |
| cg1803 | 1,55 |      |      | <i>fmt</i>   | Methionyl-tRNA formyltransferase                                                    | J  |
| cg1809 | 0,63 |      |      |              | DNA-directed RNA polymerase subunit K/omega                                         | K  |
| cg1812 | 2,35 |      | 0,47 | <i>pyrF</i>  | Orotidine-5'-phosphate decarboxylase                                                | F  |
| cg1813 | 2,61 |      |      | <i>carB</i>  | Carbamoyl-phosphate synthase, large chain                                           | EF |
| cg1814 | 1,60 |      | 0,60 | <i>carA</i>  | Carbamoyl-phosphate synthase, small chain                                           | EF |
| cg1815 | 1,65 |      |      | <i>pyrC</i>  | Dihydroorotase                                                                      | F  |
| cg1817 | 0,58 |      |      | <i>pyrR</i>  | Conserved hypothetical protein                                                      | F  |
| cg1833 |      |      | 1,61 |              | ABC-type putative iron-siderophore transporter, ATPase subunit                      | P  |
| cg1834 | 0,66 |      |      |              | ABC-type putative iron-siderophore transporter, permease subunit                    | PH |
| cg1838 |      |      | 0,62 | <i>alaS</i>  | Alanyl-tRNA synthetase                                                              | J  |
| cg1855 | 1,66 |      |      | <i>hisS</i>  | Histidyl-tRNA synthetase                                                            | J  |

|        |      |      |      |              |                                                                           |     |
|--------|------|------|------|--------------|---------------------------------------------------------------------------|-----|
| cg1860 | 0,50 |      | 1,82 |              | Putative membrane protein                                                 |     |
| cg1873 |      | 1,66 |      | <i>tesB2</i> | Acyl-CoA thioesterase II                                                  | I   |
| cg1874 | 0,51 |      |      |              | Putative membrane protein                                                 |     |
| cg1875 | 1,61 |      |      |              | Putative membrane protein                                                 |     |
| cg1879 | 1,93 |      |      |              | Putative HIT family hydrolase                                             | FGR |
| cg1883 |      | 1,54 |      |              | Putative secreted protein                                                 | S   |
| cg1884 | 0,42 |      |      |              | Putative membrane protein                                                 | R   |
| cg1890 | 1,74 | 0,44 | 0,44 |              | Hypothetical protein                                                      |     |
| cg1891 |      | 0,49 | 0,28 |              | Hypothetical protein                                                      |     |
| cg1909 | 0,52 |      |      |              | Hypothetical protein                                                      |     |
| cg1911 |      |      | 0,66 |              | Putative secreted protein                                                 |     |
| cg1915 | 1,68 |      |      |              | Hypothetical protein                                                      |     |
| cg1921 |      | 0,64 |      |              | Hypothetical protein                                                      |     |
| cg1962 |      |      | 1,72 |              | Putative membrane protein                                                 |     |
| cg1966 | 0,64 |      |      |              | Hypothetical protein                                                      |     |
| cg1980 | 0,60 |      |      |              | Hypothetical protein, MoxR-like ATPase                                    | R   |
| cg2015 |      | 0,65 |      |              | Hypothetical protein                                                      |     |
| cg2037 | 0,61 |      |      |              | Conserved hypothetical protein                                            |     |
| cg2047 | 0,65 |      |      |              | Putative secreted protein                                                 |     |
| cg2052 | 0,55 |      |      |              | Putative secreted protein                                                 |     |
| cg2056 | 0,65 |      |      |              | Putative membrane protein                                                 |     |
| cg2057 |      |      | 1,70 |              | Putative secreted protein                                                 |     |
| cg2061 | 0,51 |      | 1,72 | <i>psp3</i>  | Putative secreted protein                                                 |     |
| cg2066 | 0,65 |      |      |              | Hypothetical protein, low-complexity protein                              | S   |
| cg2079 |      | 0,64 | 0,57 |              | Conserved hypothetical protein                                            | S   |
| cg2080 |      |      | 0,62 |              | Conserved hypothetical protein                                            |     |
| cg2099 | 0,60 |      |      |              | Putative membrane protein                                                 |     |
| cg2102 |      | 1,80 |      | <i>sigB</i>  | RNA polymerase sigma factor rpoD (Sigma-A).                               | K   |
| cg2103 |      |      | 1,61 | <i>dtxR</i>  | Putative transcriptional regulator, DtxR-family                           | K   |
| cg2112 | 1,65 |      |      |              | Putative transcriptional regulator, YbaD-family                           | K   |
| cg2113 | 1,72 |      |      |              | Hypothetical protein                                                      |     |
| cg2114 | 1,53 |      |      | <i>lexA</i>  | Putative transcriptional regulator, LexA-family                           | KT  |
| cg2115 | 1,64 |      |      |              | Putative transcriptional regulator, DeoR-family                           | KG  |
| cg2117 |      |      | 0,41 | <i>ptsI</i>  | Phosphotransferase system (PTS), Enzyme I                                 | G   |
| cg2118 | 0,48 |      |      |              | Transcriptional regulator protein, DeoR-family                            | KG  |
| cg2120 | 0,59 |      |      | <i>ptsF</i>  | Phosphotransferase system (PTS), fructose-specific enzyme IIABC component | G   |
| cg2121 |      |      | 1,55 | <i>ptsH</i>  | Phosphotransferase system (PTS), phosphocarrier protein HPr               | G   |
| cg2124 |      |      | 0,53 |              | Hypothetical protein                                                      | KT  |
| cg2127 | 4,65 |      |      |              | Hypothetical protein                                                      |     |
| cg2136 | 0,61 |      |      | <i>gluA</i>  | ABC-type glutamate transporter, ATPase subunit (TC 3.A.1.3.9)             | E   |
| cg2141 | 1,58 |      |      | <i>recA</i>  | Recombinase A                                                             | L   |
| cg2151 |      |      | 1,60 |              | Conserved hypothetical protein, Similar to phage shock protein A          | KT  |
| cg2151 |      |      | 0,66 |              | Conserved hypothetical protein, Similar to phage shock protein A          | KT  |
| cg2152 |      |      | 0,50 |              | Putative transcriptional regulator, HTH_3-family                          |     |
| cg2153 | 0,54 |      | 0,49 |              | Conserved hypothetical protein, CinA-like protein                         | R   |
| cg2160 | 0,57 |      |      |              | Putative hydrolase of metallo-beta-lactamase superfamily                  | R   |
| cg2163 | 1,84 |      |      | <i>dapB</i>  | Dihydrodipicolinate reductase                                             | E   |
| cg2165 | 2,25 |      |      |              | Putative secreted protein                                                 |     |

|        |      |      |      |              |                                                                                       |    |
|--------|------|------|------|--------------|---------------------------------------------------------------------------------------|----|
| cg2167 |      | 0,40 | 0,56 | <i>rpsO</i>  | 30S ribosomal protein S15.                                                            | J  |
| cg2170 | 0,63 |      |      | <i>truB</i>  | Pseudouridylate synthase                                                              | J  |
| cg2176 | 0,66 |      | 0,47 | <i>infB</i>  | Translation initiation factor 2 (GTPase)                                              | J  |
| cg2177 |      |      | 0,57 |              | Predicted nucleic-acid-binding protein implicated in transcription termination        | K  |
| cg2178 |      |      | 0,64 | <i>nusA</i>  | Putative transcriptional termination/antitermination factor                           | K  |
| cg2181 | 2,91 | 0,56 |      |              | ABC-type putative dipeptide/oligopeptide transporter, substrate-binding lipoprotein   | E  |
| cg2182 | 1,91 |      |      |              | ABC-type putative dipeptide/oligopeptide transporter, permease subunit                | EP |
| cg2183 | 1,75 |      |      |              | ABC-type putative dipeptide/oligopeptide transporter, permease subunit                | EP |
| cg2185 | 1,53 |      |      | <i>proS</i>  | Prolyl-tRNA synthetase                                                                | J  |
| cg2195 |      |      | 1,57 |              | Putative secreted or membrane protein                                                 |    |
| cg2196 |      | 1,57 |      |              | Putative secreted or membrane protein                                                 |    |
| cg2214 |      |      | 1,53 |              | Putative Fe-S-cluster redox enzyme                                                    | R  |
| cg2215 |      |      | 1,52 |              | Putative membrane protein                                                             |    |
| cg2222 |      |      | 0,52 | <i>rpsB</i>  | 30S ribosomal protein S2                                                              | J  |
| cg2235 |      |      | 0,29 | <i>rplS</i>  | 50S ribosomal protein L19                                                             | J  |
| cg2253 |      | 0,65 | 0,49 | <i>rpsP</i>  | 30S ribosomal protein S16                                                             | J  |
| cg2254 | 0,58 |      | 0,60 |              | Putative ankyrin repeat containing protein                                            | R  |
| cg2260 |      | 0,28 |      | <i>glnK</i>  | Nitrogen regulatory protein PII                                                       | E  |
| cg2263 |      |      | 1,56 |              | Hypothetical protein                                                                  |    |
| cg2275 | 1,80 |      |      |              | Putative F0/F1 -type ATP synthase b subunit                                           | D  |
| cg2277 | 1,74 |      |      |              | ABC-type multidrug/protein/lipid transporter, permease subunit and ATPase subunit     | V  |
| cg2280 |      | 0,36 |      | <i>gdh</i>   | Glutamate dehydrogenase (NADP(+))                                                     | E  |
| cg2289 |      |      | 2,29 | <i>glgP2</i> | Phosphorylase                                                                         | G  |
| cg2291 |      |      | 1,69 | <i>pyk</i>   | Pyruvate kinase                                                                       | G  |
| cg2307 |      |      | 0,59 |              | Putative membrane protein                                                             |    |
| cg2308 | 1,93 |      |      |              | Putative secreted protein                                                             |    |
| cg2318 | 0,65 |      |      |              | ABC-type putative iron(III) dicitrate transporter, substrate-binding lipoprotein      | P  |
| cg2323 |      |      | 1,73 | <i>treY</i>  | (1->4)-Alpha-D-glucan 1-alpha-D-glucosylmutase                                        | G  |
| cg2334 |      |      | 0,58 | <i>ilvA</i>  | Threonine ammonia-lyase                                                               | E  |
| cg2343 | 0,60 |      |      |              | Putative decarboxylase                                                                | S  |
| cg2361 | 0,60 |      |      |              | Cell division initiation protein - Antigen 84 homolog                                 | D  |
| cg2376 |      |      | 1,63 |              | Putative secreted protein                                                             |    |
| cg2377 |      |      | 1,77 | <i>mraW</i>  | S-adenosylmethionine-dependent methyltransferase involved in cell envelope biogenesis | M  |
| cg2378 | 0,52 |      | 0,45 | <i>mraZ</i>  | Putative MarZ protein                                                                 | S  |
| cg2380 |      |      | 0,47 |              | Putative membrane protein                                                             |    |
| cg2401 | 0,63 |      |      |              | Secreted protein NLP/P60 family, putative peptidoglycan lytic protein                 | M  |
| cg2402 | 0,18 |      |      |              | Secreted protein NLP/P60 family                                                       | M  |
| cg2403 |      | 2,57 |      | <i>qcrB</i>  | Cytochrome b                                                                          | C  |
| cg2405 |      |      | 2,23 | <i>qcrC</i>  | Cytochrome c1                                                                         | C  |
| cg2406 |      | 1,78 |      | <i>ctaE</i>  | Cytochrome c oxidase subunit 3                                                        | C  |
| cg2409 |      | 2,16 | 1,61 | <i>ctaC</i>  | Cytochrome c oxidase subunit II                                                       | C  |
| cg2411 |      | 1,55 |      |              | Conserved hypothetical protein, HesB/YadR/YfhF family                                 | S  |
| cg2417 |      |      | 2,21 |              | Putative short-chain type                                                             | R  |

|        |      |      |      |              |                                                                                                                  |      |
|--------|------|------|------|--------------|------------------------------------------------------------------------------------------------------------------|------|
|        |      |      |      |              | oxidoreductase                                                                                                   |      |
| cg2418 | 1,61 |      |      | <i>ilvE</i>  | Branched-chain amino acid aminotransferase, AT class III                                                         | EH   |
| cg2428 | 0,55 |      |      |              | Conserved putative membrane protein                                                                              |      |
| cg2429 |      | 0,38 |      | <i>glnA</i>  | Glutamate--ammonia ligase                                                                                        | E    |
| cg2430 | 1,65 |      |      |              | Hypothetical protein                                                                                             |      |
| cg2434 |      |      | 1,85 |              | Putative monooxygenase, luciferase                                                                               | C    |
| cg2437 |      |      | 1,57 | <i>thrC</i>  | Threonine synthase                                                                                               | E    |
| cg2440 |      |      | 1,60 |              | Putative sugar/metabolite permease, MFS-type                                                                     | GEPR |
| cg2443 | 2,25 |      |      |              | Permease of the major facilitator superfamily                                                                    |      |
| cg2444 | 4,40 | 1,57 | 1,79 |              | Hypothetical protein                                                                                             |      |
| cg2445 |      |      | 1,80 | <i>hmuO</i>  | Heme oxygenase (decyclizing)                                                                                     | P    |
| cg2459 |      | 1,63 |      | <i>ptpA</i>  | Protein-tyrosine-phosphatase                                                                                     | T    |
| cg2462 | 0,63 |      |      |              | Putative transcriptional regulator, TetR-family                                                                  |      |
| cg2466 | 1,54 |      |      | <i>aceE</i>  | Pyruvate dehydrogenase (acetyl-transferring)                                                                     | C    |
| cg2467 |      |      | 0,62 |              | ABC-type transporter, ATPase subunit                                                                             | R    |
| cg2468 |      |      | 0,61 |              | ABC-type transporter, permease subunit                                                                           | R    |
| cg2470 | 1,61 |      |      |              | ABC-type transporter, substrate-binding lipoprotein                                                              | R    |
| cg2474 |      |      | 1,79 | <i>nagD</i>  | Putative phosphatase involved in N-acetylglucosamine metabolism                                                  | G    |
| cg2475 |      |      | 1,56 |              | ABC-type transporter, ATPase subunit with duplicated ATPase domain                                               | S    |
| cg2477 | 0,47 |      |      |              | Conserved hypothetical protein                                                                                   |      |
| cg2499 |      |      | 1,63 | <i>glyS</i>  | Glycine--tRNA ligase                                                                                             | J    |
| cg2500 |      |      | 1,76 |              | Putative transcriptional regulator, ArsR-family                                                                  | K    |
| cg2502 |      |      | 1,64 | <i>fur</i>   | Putative transcriptional regulator, FUR-family                                                                   | P    |
| cg2513 |      |      | 1,56 | <i>phoH2</i> | Phosphate starvation-inducible protein, PhoH-like                                                                | T    |
| cg2518 | 0,55 |      |      |              | Putative secreted protein                                                                                        |      |
| cg2531 |      | 0,63 |      | <i>idi</i>   | Isopentenyl-diphosphate delta-isomerase                                                                          | I    |
| cg2533 |      | 0,65 |      |              | Conserved hypothetical protein                                                                                   |      |
| cg2535 | 1,87 |      |      |              | Putative secreted protein                                                                                        |      |
| cg2536 |      |      | 1,78 | <i>aecD</i>  | Beta C-S lyase, AT class I                                                                                       | E    |
| cg2537 |      |      | 1,76 | <i>brnQ</i>  | Putative secondary branched-chain amino acid exporter, branched chain amino acid:cation symporter (LIVCS) family | E    |
| cg2549 | 0,59 |      |      |              | ABC-type putative dipeptide/oligopeptide transporter, substrate-binding lipoprotein                              | E    |
| cg2564 | 0,44 |      |      |              | Hypothetical protein                                                                                             |      |
| cg2567 | 0,63 |      | 1,52 |              | Hypothetical protein                                                                                             |      |
| cg2573 |      | 0,47 | 0,30 | <i>rpsT</i>  | 30S ribosomal protein S20                                                                                        | J    |
| cg2594 |      | 0,65 |      | <i>rpmA</i>  | 50S ribosomal protein L27                                                                                        | J    |
| cg2595 |      | 0,58 | 0,64 | <i>rplU</i>  | 50S ribosomal protein L21                                                                                        | J    |
| cg2610 |      | 0,62 |      |              | ABC-type putative dipeptide/oligopeptide transporter, substrate-binding lipoprotein                              | E    |
| cg2613 | 3,06 |      | 2,01 | <i>mdh</i>   | Malate dehydrogenase                                                                                             | C    |
| cg2614 |      |      | 1,75 |              | Putative transcriptional regulator, TetR-family                                                                  |      |
| cg2630 | 0,62 |      |      | <i>pcaG</i>  | Protocatechuate 3,4-dioxygenase, alpha subunit                                                                   | Q    |
| cg2644 | 2,14 | 1,83 | 2,93 | <i>clpP2</i> | Endopeptidase Clp, proteolytic subunit                                                                           | OU   |
| cg2645 | 2,10 | 2,02 |      | <i>clpP1</i> | Endopeptidase Clp, proteolytic subunit                                                                           | OU   |

|        |      |      |      |              |                                                                                                                                                 |     |
|--------|------|------|------|--------------|-------------------------------------------------------------------------------------------------------------------------------------------------|-----|
| cg2651 | 0,60 |      |      |              | Conserved hypothetical protein, putative pseudogen                                                                                              |     |
| cg2657 | 2,68 |      |      |              | Putative membrane protein, putative pseudogen                                                                                                   |     |
| cg2662 |      |      | 1,91 | <i>pepN</i>  | Membrane alanyl aminopeptidase                                                                                                                  | E   |
| cg2670 |      | 0,65 |      | <i>crtI'</i> | Putative phytoene dehydrogenase, putative pseudogen (N-terminal fragment)                                                                       | Q   |
| cg2674 | 0,50 |      | 2,93 |              | Alkylhydroperoxidase, AhpD-family core domain                                                                                                   | S   |
| cg2675 | 0,37 |      | 2,47 |              | ABC-type putative dipeptide/oligopeptide transporter, ATPase subunit                                                                            | R   |
| cg2678 |      |      | 1,75 |              | ABC-type putative dipeptide/oligopeptide transporter, substrate-binding lipoprotein                                                             | E   |
| cg2686 | 1,79 |      |      |              | Putative transcriptional regulator, TetR-family                                                                                                 |     |
| cg2687 | 1,54 |      |      | <i>metB</i>  | Cystathionine gamma-synthase                                                                                                                    | E   |
| cg2695 | 1,97 |      |      |              | ABC-type transporter, ATPase subunit                                                                                                            | R   |
| cg2704 |      |      | 0,35 |              | ABC-type putative sugar transporter, permease subunit                                                                                           | G   |
| cg2705 |      |      | 0,44 | <i>amyE</i>  | ABC-type putative sugar transporter, substrate-binding lipoprotein                                                                              | G   |
| cg2707 | 2,51 |      | 0,40 |              | Conserved hypothetical protein                                                                                                                  |     |
| cg2708 | 4,34 |      | 0,37 | <i>msiK1</i> | ABC-type putative sugar transporter, ATPase subunit                                                                                             | G   |
| cg2732 |      | 1,86 | 2,41 | <i>gntV</i>  | Gluconokinase                                                                                                                                   | G   |
| cg2770 | 1,56 |      |      |              | Conserved hypothetical protein                                                                                                                  |     |
| cg2792 | 1,79 |      |      | <i>nadE</i>  | NAD(+) synthase (glutamine-hydrolyzing)                                                                                                         | H   |
| cg2794 | 2,95 |      |      |              | Conserved hypothetical protein                                                                                                                  |     |
| cg2796 | 0,10 |      | 1,93 |              | Conserved hypothetical protein, MMGE/PRPD-family, putative involved in propionate catabolism                                                    | R   |
| cg2797 | 0,06 |      |      |              | Conserved hypothetical protein                                                                                                                  | S   |
| cg2800 | 1,79 |      |      | <i>pgm</i>   | Phosphoglucomutase                                                                                                                              | G   |
| cg2805 |      |      | 0,64 | <i>psp4</i>  | Putative secreted protein                                                                                                                       |     |
| cg2810 |      |      | 2,91 |              | Putative secondary H <sup>+</sup> /Na <sup>+</sup> :glutamate/dicarboxylate symporter, dicarboxylate/amino acid:cation symporter (DAACS) family | C   |
| cg2811 |      |      | 1,58 |              | ABC-type lipoprotein release transporter, permease subunit                                                                                      | V   |
| cg2833 |      |      | 6,77 | <i>cysK</i>  | O-Acetylserine (Thiol)-Lyase                                                                                                                    | E   |
| cg2835 | 0,62 |      |      |              | Putative acetyltransferase                                                                                                                      | R   |
| cg2837 | 2,02 |      |      | <i>sucC</i>  | Succinate--CoA ligase (ADP-forming), beta subunit                                                                                               | C   |
| cg2838 | 1,95 |      |      |              | Putative dithiol-disulfide isomerase                                                                                                            | Q   |
| cg2840 |      |      | 0,55 | <i>actA</i>  | Putative coenzyme A transferase                                                                                                                 | C   |
| cg2842 | 0,56 |      | 0,65 | <i>phoU</i>  | Phosphate transport system protein PhoU, putative phosphate uptake regulator                                                                    | P   |
| cg2846 | 2,83 | 3,59 | 1,58 | <i>pstS</i>  | ABC-type putative phosphate transporter, substrate-binding lipoprotein (TC 3.A.1.7.1)                                                           | P   |
| cg2850 |      |      | 1,79 |              | Conserved hypothetical protein                                                                                                                  |     |
| cg2862 | 1,55 |      |      | <i>purL</i>  | Phosphoribosylformylglycinamide synthase subunit                                                                                                | F   |
| cg2863 | 1,93 |      |      | <i>purQ</i>  | Phosphoribosylformylglycinamide synthase subunit                                                                                                | F   |
| cg2865 | 2,03 |      |      | <i>purS</i>  | Phosphoribosylformylglycinamide synthase subunit                                                                                                | F   |
| cg2873 |      |      | 1,63 | <i>ptrB</i>  | Oligopeptidase B                                                                                                                                | E   |
| cg2875 | 0,53 |      |      |              | Hypothetical protein                                                                                                                            |     |
| cg2880 | 1,70 |      |      |              | Putative hydrolase, HIT-family                                                                                                                  | FGR |
| cg2888 | 4,40 |      |      | <i>cgtR3</i> | Two-component system, transcriptional response regulator                                                                                        | TK  |

|        |      |      |      |                       |                                                                                      |      |
|--------|------|------|------|-----------------------|--------------------------------------------------------------------------------------|------|
| cg2891 |      |      | 1,65 | <i>pqo</i>            | Pyruvate:quinone oxidoreductase                                                      | EH   |
| cg2893 | 1,56 |      |      |                       | Putative multidrug efflux permease, MFS-type                                         | GEPR |
| cg2902 | 1,68 |      |      |                       | Conserved hypothetical protein, hydrolases of the HAD superfamily                    | R    |
| cg2909 | 0,66 |      |      | <i>otsB</i>           | Trehalose phosphatase                                                                | G    |
| cg2911 | 0,48 |      |      |                       | ABC-type putative Mn/Zn transporter, substrate-binding lipoprotein                   | P    |
| cg2924 |      |      | 0,65 | <i>cysS</i>           | Cysteine--tRNA ligase                                                                | J    |
| cg2925 | 0,47 |      | 0,55 | <i>ptsS</i>           | Phosphotransferase system (PTS), sucrose-specific enzyme IIBC component              | G    |
| cg2939 | 1,83 |      |      |                       | ABC-type putative dipeptide/oligopeptide transporter, ATPase subunit                 | EP   |
| cg2942 |      | 0,58 |      |                       | Putative transcriptional regulator, AsnC-family                                      | K    |
| cg2943 |      | 1,59 |      |                       | Putative membrane protein                                                            |      |
| cg2949 | 1,55 |      |      |                       | Putative secreted protein                                                            |      |
| cg2956 |      |      | 0,65 |                       | Putative secreted protein                                                            |      |
| cg2958 |      |      | 2,08 | <i>butA</i>           | L-2,3-Butanediol dehydrogenase/acetoin reductase                                     | QR   |
| cg2963 |      | 2,22 |      | <i>clpC</i>           | Putative ATP-dependent protease (heat shock protein)                                 | O    |
| cg2969 |      |      | 1,55 |                       | Hypothetical protein, similar to acyl-CoA synthetases (AMP-forming)/AMP-acid ligases |      |
| cg2977 |      | 0,54 |      |                       | Putative membrane protein                                                            |      |
| cg3000 | 0,36 |      |      |                       | Putative thiosulfate sulfurtransferase                                               | P    |
| cg3007 | 0,50 |      |      |                       | Conserved hypothetical protein                                                       | S    |
| cg3008 |      | 1,64 | 1,70 | <i>porA</i>           | Porin                                                                                |      |
| cg3009 |      |      | 2,49 | <i>porH</i>           | Porin, cation-specific                                                               |      |
| cg3021 |      |      | 1,62 |                       | Putative peptidase M20/M25/M40 family                                                | E    |
| cg3043 | 2,01 |      |      |                       | Putative NTP pyrophosphohydrolase/oxidative damage repair enzyme                     | LR   |
| cg3048 | 0,59 |      |      | <i>pta</i>            | Phosphate acetyltransferase                                                          | C    |
| cg3049 | 1,69 |      |      | <i>fpr1</i>           | Ferredoxin--NADP(+) reductase                                                        | ER   |
| cg3058 |      | 0,57 | 0,40 | <i>tnp8b(l SCg8a)</i> | Transposase                                                                          |      |
| cg3068 | 1,79 |      |      | <i>fda</i>            | Fructose-bisphosphate aldolase                                                       | G    |
| cg3078 | 1,52 |      |      |                       | Hypothetical protein                                                                 |      |
| cg3079 | 1,89 |      |      | <i>clpB</i>           | Putative ATP-dependent protease (heat shock protein)                                 | O    |
| cg3097 | 2,17 |      |      | <i>hspR</i>           | Putative transcriptional regulator, MerR-family                                      | K    |
| cg3099 | 1,82 |      | 1,86 | <i>grpE</i>           | Chaperone GrpE, heat shock protein                                                   | O    |
| cg3100 |      | 0,56 | 2,76 | <i>dnaK</i>           | Chaperone DnaK, heat shock protein                                                   | O    |
| cg3107 | 1,70 |      |      | <i>adhA</i>           | Alcohol dehydrogenase                                                                | R    |
| cg3112 |      |      | 2,06 | <i>cysZ</i>           | Sulfate permease                                                                     | R    |
| cg3113 |      |      | 2,96 | <i>cysY</i>           | Sirohydrochlorin ferrochelatase                                                      | S    |
| cg3114 |      |      | 2,90 | <i>cysN</i>           | Sulfate adenyllyltransferase subunit 1                                               | P    |
| cg3115 |      |      | 2,54 | <i>cysD</i>           | Sulfate adenyllyltransferase subunit 2                                               | EH   |
| cg3116 |      |      | 2,55 | <i>cysH</i>           | Adenosine phosphosulfate reductase                                                   | EH   |
| cg3118 |      |      | 3,48 | <i>cysI</i>           | Ferredoxin-sulfite reductase                                                         | P    |
| cg3119 |      |      | 2,36 | <i>fpr2</i>           | Ferredoxin--NADP(+) reductase                                                        | ER   |
| cg3120 |      |      | 1,62 |                       | Conserved hypothetical protein                                                       | S    |
| cg3138 | 1,64 |      |      |                       | Putative membrane protease subunit, stomatin/prohibitin homolog                      | O    |
| cg3140 |      | 0,13 | 0,35 | <i>tagA1</i>          | DNA-3-methyladenine glycosylase                                                      | L    |

|        |      |      |      |              |                                                                              |    |
|--------|------|------|------|--------------|------------------------------------------------------------------------------|----|
|        |      |      |      |              | I                                                                            |    |
| cg3141 | 1,54 | 0,19 | 0,46 |              | Hypothetical protein                                                         | C  |
| cg3142 | 2,33 |      |      |              | Putative membrane protein                                                    |    |
| cg3143 | 1,87 |      |      |              | Conserved putative secreted protein                                          | R  |
| cg3156 | 1,73 |      |      |              | Putative secreted protein                                                    |    |
| cg3157 |      |      | 1,55 |              | Putative secreted protein                                                    | V  |
| cg3159 | 1,57 |      |      |              | Putative universal stress protein UspA or related nucleotide-binding protein | T  |
| cg3169 | 1,86 |      | 1,91 | <i>pck</i>   | Phosphoenolpyruvate carboxykinase (GTP)                                      | C  |
| cg3175 |      |      | 0,50 |              | Putative membrane protein                                                    | S  |
| cg3179 | 0,64 |      |      | <i>fadD2</i> | Putative long-chain-fatty-acid--CoA ligase                                   | IQ |
| cg3186 | 0,57 |      |      | <i>cmt2</i>  | Trehalose corynomycolyl transferase                                          | R  |
| cg3192 |      |      | 2,16 |              | Putative secreted or membrane protein                                        |    |
| cg3193 |      |      | 1,96 |              | Putative membrane-associated phospholipid phosphatase                        | I  |
| cg3195 | 2,09 |      |      |              | Putative flavin-containing monooxygenase                                     | P  |
| cg3196 |      |      | 0,60 | <i>glf</i>   | UDP-galactopyranose mutase                                                   | M  |
| cg3197 |      |      | 0,63 | <i>psp5</i>  | Putative secreted protein                                                    |    |
| cg3200 | 2,02 |      |      |              | Putative acyltransferase family                                              | I  |
| cg3201 | 1,74 |      |      | <i>serS</i>  | Serine--tRNA ligase                                                          | J  |
| cg3202 | 4,03 |      |      |              | Putative transcriptional regulator, GntR-family                              | K  |
| cg3211 | 7,30 |      |      |              | Putative secreted protein                                                    |    |
| cg3212 | 1,88 |      |      |              | Putative carboxymuconolactone decarboxylase subunit                          | S  |
| cg3213 | 2,82 |      |      |              | Putative secreted protein                                                    |    |
| cg3218 |      |      | 1,94 |              | Pyruvate kinase                                                              | G  |
| cg3219 | 1,91 | 1,71 |      | <i>ldh</i>   | L-Lactate dehydrogenase                                                      | C  |
| cg3223 |      |      | 1,54 |              | Conserved hypothetical protein, putative FMN reductase                       | R  |
| cg3226 |      |      | 0,56 |              | Putative MFS-type L-lactate permease                                         |    |
| cg3227 | 2,25 |      | 0,56 | <i>lldA</i>  | Quinone dependent L-lactate dehydrogenase                                    | C  |
| cg3231 |      | 0,59 |      |              | Hypothetical protein                                                         |    |
| cg3233 | 1,72 |      |      |              | Hypothetical protein                                                         | S  |
| cg3234 | 1,81 |      |      |              | Putative metal-dependent amidase/aminoacylase/carboxypeptidase               | R  |
| cg3236 | 2,14 | 1,83 |      | <i>msrA</i>  | Protein-methionine-S-oxide reductase                                         | O  |
| cg3237 |      | 1,68 | 2,57 | <i>sod</i>   | Superoxide dismutase                                                         | P  |
| cg3240 |      | 2,25 | 3,44 |              | Putative multidrug efflux permease, MFS-type                                 |    |
| cg3253 | 1,56 |      |      | <i>mcbR</i>  | Global transcriptional repressor of sulfur metabolism, TetR-family           |    |
| cg3254 | 0,58 |      |      |              | Putative membrane protein                                                    | S  |
| cg3255 | 7,35 | 1,64 |      | <i>uspA3</i> | Universal stress protein E                                                   | T  |
| cg3264 | 1,72 |      |      |              | Conserved hypothetical protein                                               | KT |
| cg3265 |      |      | 1,60 |              | Hypothetical protein                                                         |    |
| cg3272 |      |      | 0,57 |              | Putative membrane protein                                                    | S  |
| cg3275 | 1,66 |      |      | <i>fdxA</i>  | Putative ferredoxin                                                          | C  |
| cg3277 |      |      | 0,64 |              | Hypothetical protein, containing double-stranded beta-helix domain           | S  |
| cg3282 | 2,30 |      |      |              | Putative Cu <sup>2+</sup> transporting P-type ATPase                         | P  |
| cg3292 |      |      | 0,56 |              | Putative heavy-metal ion transporting P-type ATPase                          | P  |
| cg3300 |      |      | 0,52 |              | Putative Cu <sup>2+</sup> transporting P-type ATPase                         | P  |
| cg3301 |      |      | 0,63 |              | Putative sugar/metabolite permease, MFS-type                                 |    |

|        |      |      |      |              |                                                                         |    |
|--------|------|------|------|--------------|-------------------------------------------------------------------------|----|
| cg3303 |      |      | 0,43 |              | Putative transcriptional regulator, PadR-family                         | K  |
| cg3304 | 1,78 |      |      | <i>dnaB</i>  | Putative replicative DNA helicase                                       | L  |
| cg3306 |      | 0,54 | 0,41 | <i>rplI</i>  | 50S ribosomal protein L9                                                | J  |
| cg3307 |      | 0,34 | 0,42 | <i>ssb</i>   | Single-strand binding protein                                           | L  |
| cg3308 | 1,53 | 0,63 |      | <i>rpsF</i>  | 30S ribosomal protein S6                                                | J  |
| cg3315 | 0,45 |      | 2,20 |              | Putative transcriptional regulator, MarR-family                         | K  |
| cg3316 | 0,46 |      | 2,05 |              | Putative universal stress protein or related nucleotide-binding protein | T  |
| cg3317 | 1,69 |      |      |              | Putative membrane protein                                               |    |
| cg3319 | 2,46 |      |      |              | Conserved hypothetical protein                                          | R  |
| cg3323 | 3,69 |      |      |              | Inositol-3-phosphate synthase                                           | I  |
| cg3327 |      | 2,94 | 2,89 | <i>dps</i>   | Putative starvation-induced DNA protecting protein                      | P  |
| cg3337 | 1,79 |      |      |              | Putative membrane protein                                               | V  |
| cg3338 | 3,33 |      |      |              | Putative membrane protein                                               | V  |
| cg3340 |      |      | 1,64 | <i>dadA</i>  | D-Amino-acid dehydrogenase                                              | E  |
| cg3343 | 2,16 |      | 1,67 |              | Putative secreted membrane protein                                      |    |
| cg3344 | 2,29 |      |      |              | Putative nitroreductase                                                 | C  |
| cg3346 | 2,08 |      |      | <i>leuS</i>  | Leucine--tRNA ligase                                                    | J  |
| cg3357 |      |      | 0,47 | <i>trpP</i>  | Permease, tryptophan-specific                                           |    |
| cg3359 |      | 0,62 |      | <i>trpE</i>  | Anthranilate synthase subunit I                                         | EH |
| cg3359 |      |      | 0,39 | <i>trpE</i>  | Anthranilate synthase subunit I                                         | EH |
| cg3369 | 2,08 |      |      | <i>qcrA2</i> | Putative rieske iron-sulfur protein                                     | PR |
| cg3370 |      | 0,58 |      |              | Putative NADH-dependent flavin oxidoreductase                           | C  |
| cg3380 | 0,61 |      |      |              | Putative oxidoreductase protein                                         |    |
| cg3423 | 1,68 |      |      | <i>trxC</i>  | Thioredoxin                                                             | OC |
| cg3432 | 0,48 |      |      | <i>rpmH</i>  | 50S ribosomal protein L34                                               | J  |

a Locus tag according to [50]

b COG class according to [11]
